# Supplementary material
Source: PubMed Central journal article supplement (PMC6364676)
Supplement: NIHMS1005779-supplement-2.pdf [file NIHMS1005779-supplement-2.pdf]

**Supplementary Table 1A. Germline aberrations currently in clinical trials**

| Clinical trial ID | Condition                                                           | Germline query                                                                                                                                                               | Context                                                      |
|-------------------|---------------------------------------------------------------------|------------------------------------------------------------------------------------------------------------------------------------------------------------------------------|--------------------------------------------------------------|
| NCT02032823       | Breast cancer                                                       | gBRCA_del_mt                                                                                                                                                                 | Olaparib                                                     |
| NCT02184195       | Pancreatic cancer                                                   | gBRCA_del_mt                                                                                                                                                                 | Olaparib                                                     |
| NCT02476968       | Ovarian cancer                                                      | gBRCA_del_mt                                                                                                                                                                 | Olaparib                                                     |
| NCT02855697       | High-grade serous/endometrioid ovarian cancer (HGS/EOC)             | gBRCA_del_mt                                                                                                                                                                 | Olaparib                                                     |
| NCT02693535       | Lymphoma, non-Hodgkin                                               | gBRCA_del_mt/ gATM                                                                                                                                                           | Olaparib                                                     |
| NCT02489006       | Ovarian cancer, fallopian tube cancer                               | gBRCA_del_mt1/2, RAD51B, RAD51C, RAD51D, PPM1D, FANCM, BRIP1, PALB2, and BARD1                                                                                               | Olaparib                                                     |
| NCT02789332       | Breast cancer                                                       | gBRCA_del_mt/ homologous recombination deficiency (HRD) genes                                                                                                                | Olaparib and paclitaxel                                      |
| NCT01945775       | Breast neoplasms                                                    | gBRCA_del_mt                                                                                                                                                                 | Talazoparib                                                  |
| NCT01905592       | Carcinoma of breast                                                 | gBRCA_del_mt                                                                                                                                                                 | Niraparib                                                    |
| NCT02505048       | Breast cancer                                                       | gBRCA_del_mt WT                                                                                                                                                              | Rucaparib                                                    |
| NCT02157792       | Advanced solid tumor, breast cancer                                 | gBRCA_del_mt WT                                                                                                                                                              | VX-970                                                       |
| NCT02608346       | Women with gBRCA_del_mt1 mutations                                  | gBRCA_del_mt                                                                                                                                                                 | Circulating DNA                                              |
| NCT01670500       | Breast cancer                                                       | gBRCA_del_mt                                                                                                                                                                 | Cisplatin                                                    |
| NCT02282020       | Ovarian cancer                                                      | gBRCA_del_mt                                                                                                                                                                 | Cisplatin                                                    |
| NCT01982448       | Triple negative breast cancer                                       | gBRCA_del_mt WT/ HRD assay                                                                                                                                                   | Cisplatin                                                    |
| NCT01525589       | Breast cancer                                                       | gBRCA_del_mt                                                                                                                                                                 | PM01183                                                      |
| NCT00496288       | Breast cancer                                                       | gBRCA_del_mt                                                                                                                                                                 | Prophylactic irradiation                                     |
| NCT02053805       | Prostate cancer                                                     | gBRCA_del_mt (and Lynch)                                                                                                                                                     | Prostate cancer risk                                         |
| NCT02557776       | Hereditary breast cancer                                            | gBRCA_del_mt                                                                                                                                                                 | Screening                                                    |
| NCT02497820       | Colorectal cancer                                                   | gMMR/Lynch syndrome genes                                                                                                                                                    | Chemoprevention by aspirin                                   |
| NCT02813824       | Lynch syndrome patients with colorectal adenomas                    | gMMR/Lynch syndrome genes                                                                                                                                                    | Chemoprevention by aspirin                                   |
| NCT02401347       | Breast cancer                                                       | HR pathway: PTEN, PALB2, CHEK2, ATM, NBN, BARD1, BRIP1, RAD50, RAD51C, RAD51D, MRE11, ATR, FANC group genes                                                                  | Talazoparib                                                  |
| NCT02664389       | Breast cancer                                                       | cancer predisposition gene panel                                                                                                                                             | Early onset cancers with sporadic or hereditary presentation |
| NCT02759835       | Lung adenocarcinoma                                                 | gEGFR T790M                                                                                                                                                                  | Local ablative therapy after treatment with osimertinib      |
| NCT02282917       | Vestibular schwannoma                                               | gNF2                                                                                                                                                                         | AR-42 histone deacetylase inhibitor                          |
| NCT02823652       | Advanced malignant neoplasm                                         | germline tests                                                                                                                                                               | Genetic counselling                                          |
| NCT02019693       | Papillary renal cell carcinoma                                      | gMET activating                                                                                                                                                              | Reference                                                    |
| NCT00579514       | Breast, bladder, kidney, colon, prostate, and lung cancer incidence | PCR/PCR/LDR: polymorphisms in BRCA1, BRCA2, PTEN, TGFβ1, TGFβ-1, ATM, CHK2, APC, ER, PR, MCP-1, MPIF, CCR2/5 and CCR3, cytokine signaling, and apoptosis regulatory pathways | Cancer incidence                                             |
| NCT01003522       | Non-small cell lung cancer                                          | whole genome                                                                                                                                                                 | Lung cancer                                                  |
| NCT01372696       | Colorectal cancer                                                   | whole genome                                                                                                                                                                 | Colorectal cancer                                            |
| NCT02285179       | Breast cancer                                                       | whole genome                                                                                                                                                                 | Pharmacogenetics                                             |
| NCT02747888       | Thyroid cancer                                                      | whole genome                                                                                                                                                                 | Thyroid cancer risk                                          |
| NCT01855477       | Solid tumors                                                        | background reference                                                                                                                                                         | -                                                            |
| NCT01904916       | Solid tumors                                                        | background reference                                                                                                                                                         | -                                                            |
| NCT01946100       | Lung neoplasms                                                      | background reference                                                                                                                                                         | -                                                            |
| NCT02695459       | Neuroendocrine carcinomas                                           | background reference                                                                                                                                                         | -                                                            |
